# Supplementary material for: Prevalence and Antimicrobial Resistance of Enterococcus Species: A Retrospective Cohort Study in Italy
Source: Antibiotics (Basel). 2021 Dec 19;10(12):1552. doi: 10.3390/antibiotics10121552 (PMC8698357; doi:10.3390/antibiotics10121552)
Supplement: Supplementary file 1 [file antibiotics-10-01552-s001.zip › antibiotics-1459143-supplementary.pdf]

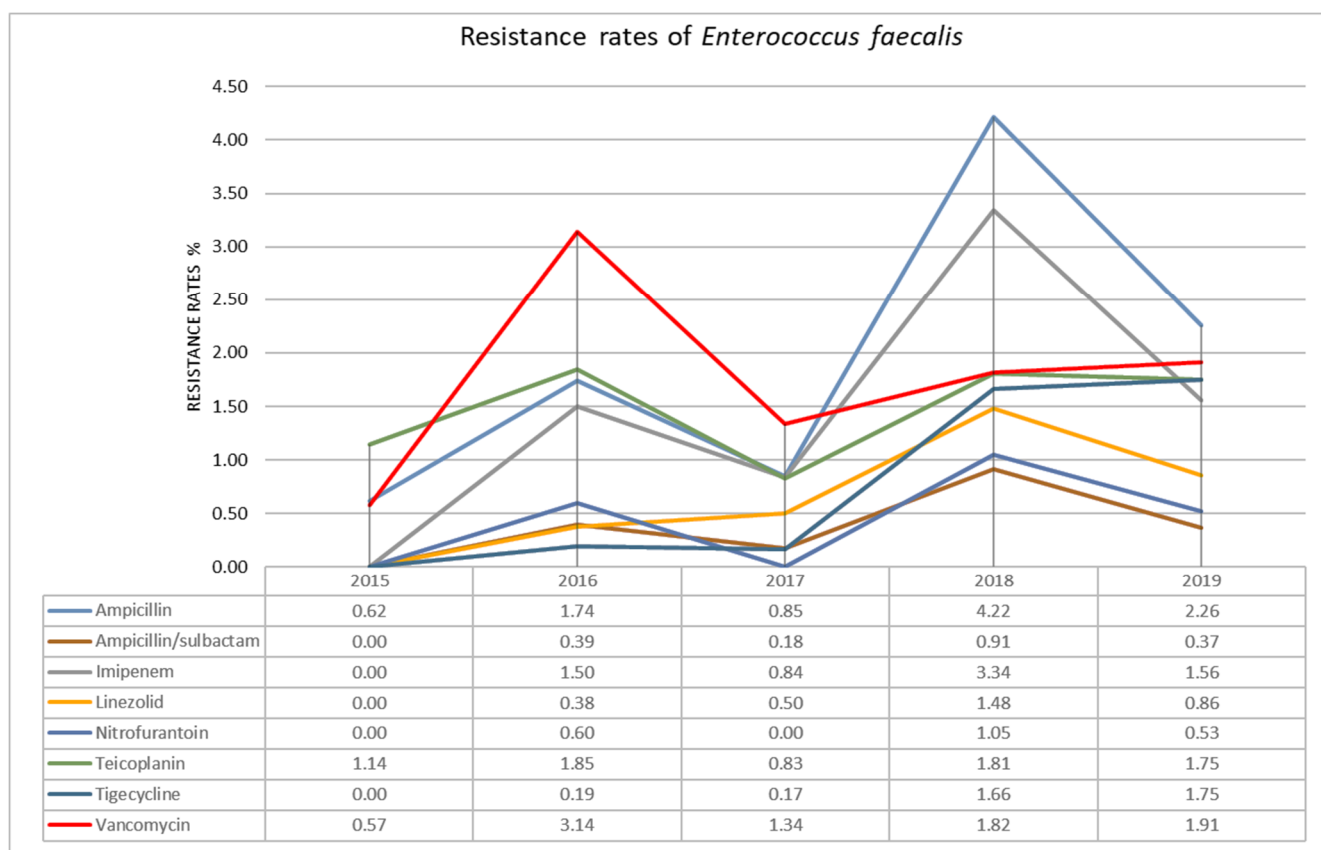

**Figure S1.** Resistance rates of the clinical isolates of *Enterococcus faecalis* to antimicrobial agents.

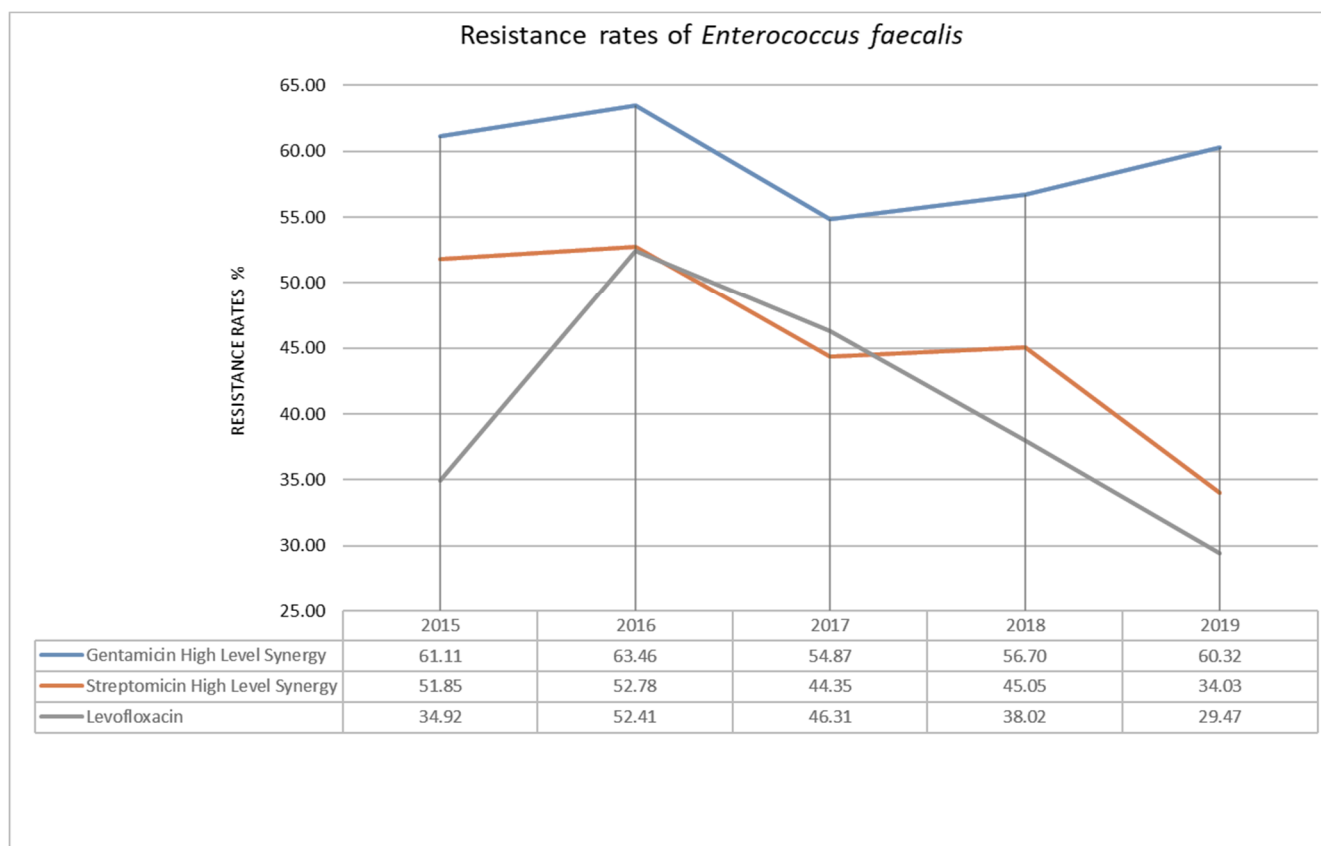

**Figure S2.** Resistance rates of the clinical isolates of *Enterococcus faecalis* to antimicrobial agents.

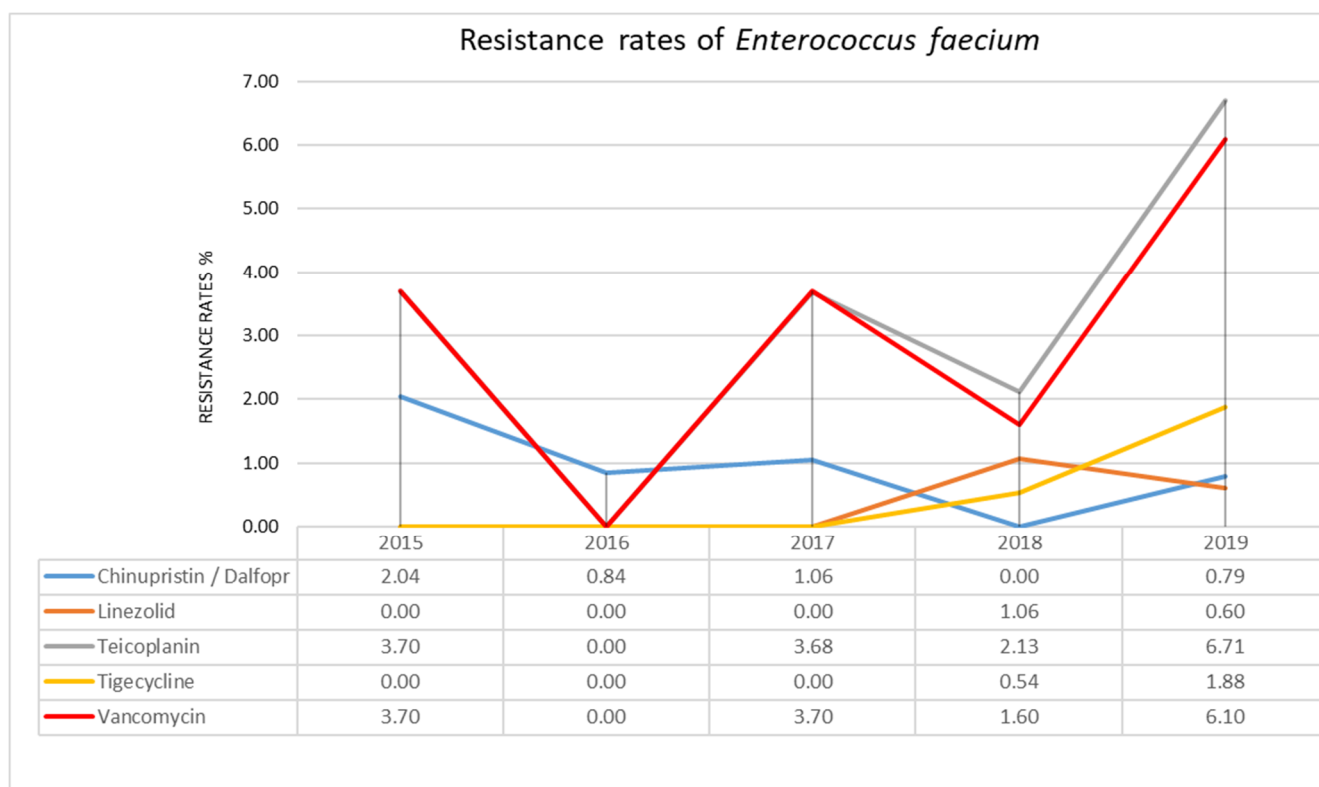

**Figure S3.** Resistance rates of the clinical isolates of *Enterococcus faecium* to antimicrobial agents.

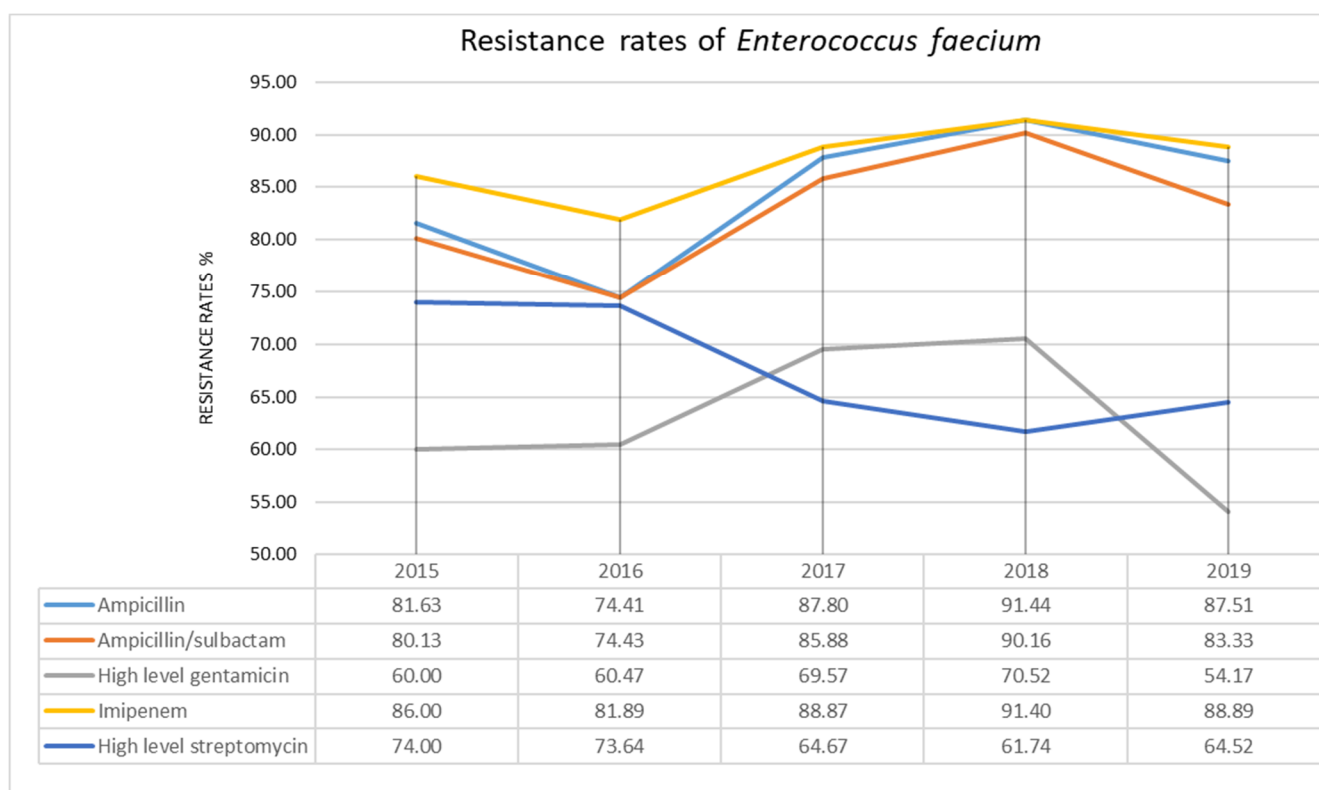

**Figure S4.** Resistance rates of the clinical isolates of *Enterococcus faecium* to antimicrobial agents.
